# Supplementary material
Source: Springer Nature journal article supplement (https://www.springerprofessional.de/resource/supplementary/40095_2012_52_MOESM6_ESM.pdf/11899726)

## Reynold No. Vs Thermal Efficiency

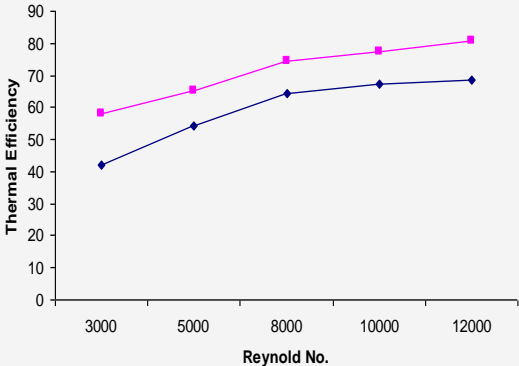

◆ Smooth Plate    ■ Rough Plate

Supplement: MOESM6 [file 11899726]
